# Supplementary material for: Graphene oxide as dual functional interface modifier for improving wettability and retarding recombination in hybrid perovskite solar cells
Source: Royal Society of Chemistry journal article supplement (doi:10.1039/c4ta05196c), 2014-01-01
Supplement: c4ta05196c1.pdf [file c4ta05196c1.pdf]

## Supporting Information

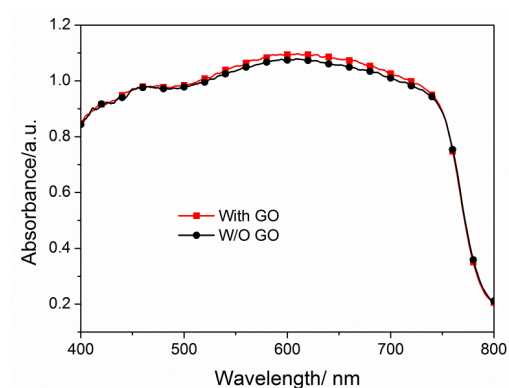

Fig. S1. UV-vis absorption of  $\text{TiO}_2$ /perovskite films without GO treatment (black line) and with GO treatment (red line).
